# Supplementary material for: Antioxidant and Antimicrobial Properties and GC-MS Chemical Compositions of Makwaen Pepper (Zanthoxylum myriacanthum) Extracted Using Supercritical Carbon Dioxide
Source: MDPI journal article supplement (doi:10.3390/plants12112211), 2023-06-03
Supplement: s1 [file s1]

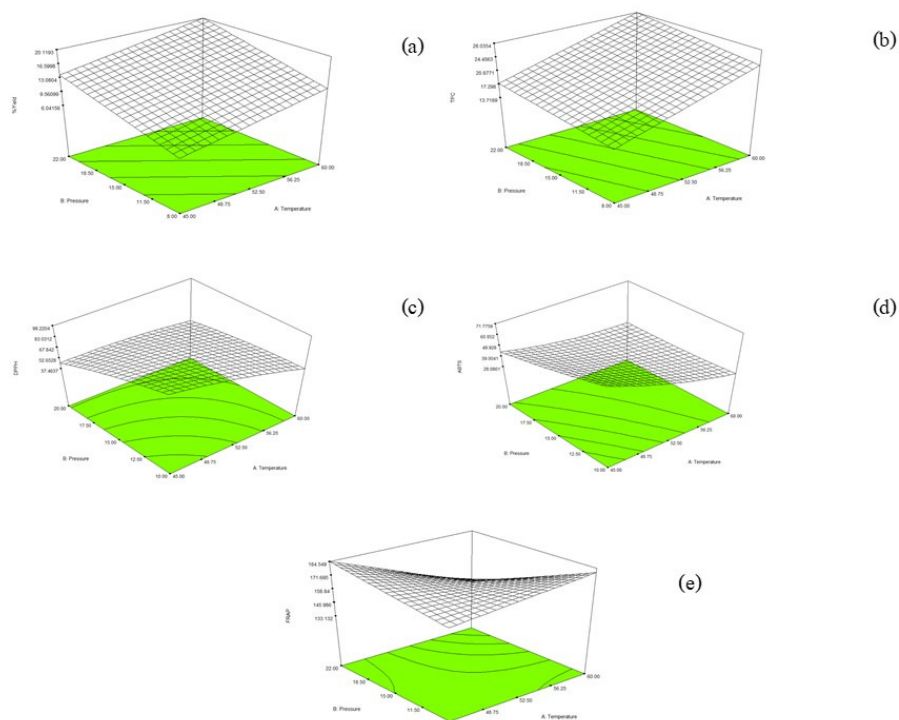

**Figure S1.** Contour plots of ME in terms of a) Yield (%) (b) Total phenolic compounds (c) DPPH, (d) ABTS, and (e) FRAP as a function of temperature and pressure.

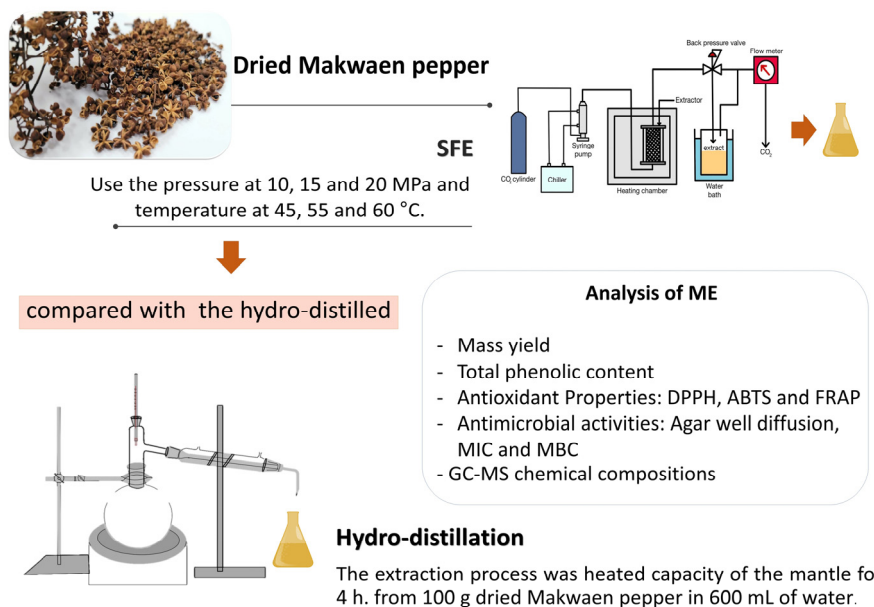

**Figure S2.** Design of experiment for the extraction of Makwaen pepper using SFE and hydro-distillation extraction.

**Table S1.** Regression equations, coefficient of determinations ( $R^2$ ), and  $p$  values of each response of ME using SFE.

| Responses                                      | Regression equation                                                                   | Adj $R^2$ | $p$ -value |
|------------------------------------------------|---------------------------------------------------------------------------------------|-----------|------------|
| Yield (%)                                      | $-17.15 + 0.41 * X_1 + 0.55 * X_2$                                                    | 0.875     | 0.0002     |
| Total phenols<br>(mg GAE/mL)                   | $-19.83 + 0.70 * X_1 + 0.28 * X_2$                                                    | 0.767     | 0.0030     |
| IC <sub>50</sub> DPPH<br>( $\mu$ g/mL extract) | $210.02 + 0.97 * X_1 - 13.08 * X_2 - 0.06 * X_1^2 - 0.11 * X_2^2 + 0.25 * X_1 * X_2$  | 0.990     | <0.0001    |
| IC <sub>50</sub> ABTS<br>( $\mu$ g/mL extract) | $491.90 - 11.46 * X_1 - 12.26 * X_2 + 0.07 * X_1^2 + 0.05 * X_2^2 + 0.18 * X_1 * X_2$ | 0.998     | <0.0001    |

$p$ -value indicates a significant difference at 95% confidence ( $p < 0.05$ ). \*\* $X_1$ = Temperature,  $X_2$ = Pressure.

**Table S2.** Pearson Correlation for total phenolic compounds with antioxidation.

|      | Correlations (Pearson Correlation) |        |       |      |
|------|------------------------------------|--------|-------|------|
|      | TPC                                | DPPH   | ABTS  | FRAP |
| TPC  | 1                                  |        |       |      |
| DPPH | -0.654*                            | 1      |       |      |
| ABTS | -0.783*                            | 0.841* | 1     |      |
| FRAP | -0.279                             | 0.250  | 0.302 | 1    |

\* indicates a significant difference at 95% confidence ( $p < 0.05$ ).
